# Supplementary material
Source: Royal Society of Chemistry journal article supplement (doi:10.1039/d6en00322b)
Supplement: d6en00322b1.pdf [file d6en00322b1.pdf]

## Zero-Dimensional Graphene-Core Carbon Nanodots Confined in Mesoporous Silica for $\pi$ -Selective Extraction of Polycyclic Aromatic Hydrocarbons from Lipophilic Media

Nathália Carvalho da Silva, Albina Mikhralieva, Renato da Silva Carreira, Carlos German Massone, and Volodymyr Zaitsev

Supplementary materials

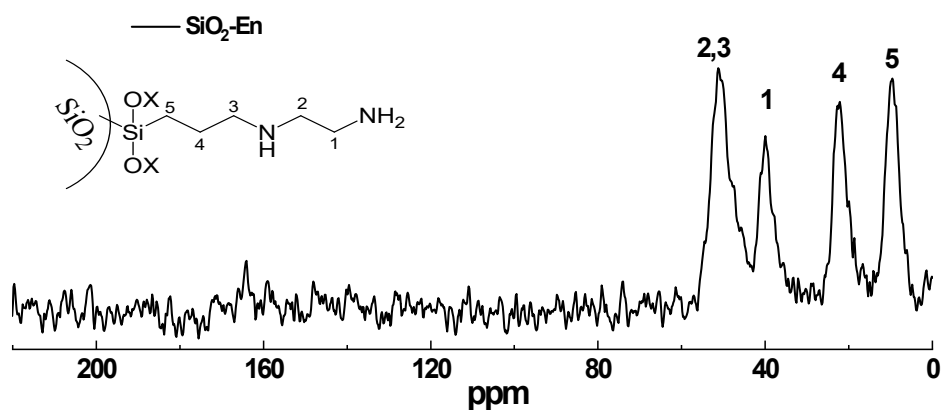

Figure S1. <sup>13</sup>C solid-state NMR spectra of SiO<sub>2</sub>-En

Table S1. Processing of data relating to the validation of the SPE cycle method

| No. | Analyte | Calibration equations | Correlation coefficient (R <sup>2</sup> ) | Linear range, ng mL <sup>-1</sup> | LOD, ng mL <sup>-1</sup> | LOQ, ng mL <sup>-1</sup> |
|-----|---------|-----------------------|-------------------------------------------|-----------------------------------|--------------------------|--------------------------|
| 1   | Nap     | Y=0,0104x+0,0098      | 0,9999                                    | 0,5-100                           | 0,54                     | 1,64                     |
| 2   | Acy     | Y=0,0157x-0,0036      | 0,9992                                    | 0,5-100                           | 1,59                     | 4,82                     |
| 3   | Ace     | Y=0,0108x-0,0019      | 0,9999                                    | 0,5-100                           | 0,55                     | 1,67                     |
| 4   | Flu     | Y=0,0125x+0,0004      | 0,9995                                    | 0,5-100                           | 1,19                     | 3,60                     |
| 5   | Phe     | Y=0,0109x-0,0033      | 0,9995                                    | 0,5-100                           | 1,33                     | 4,02                     |
| 6   | Ant     | Y=0,0089x-0,0101      | 0,9979                                    | 0,5-100                           | 2,43                     | 7,36                     |
| 7   | Flt     | Y=0,0106x-0,0048      | 0,9987                                    | 0,5-100                           | 1,91                     | 5,79                     |
| 8   | Pyr     | Y=0,0125x+0,0106      | 0,9996                                    | 0,5-100                           | 1,08                     | 3,26                     |
| 9   | BaA     | Y=0,0086x+0,0089      | 0,9998                                    | 0,5-100                           | 0,88                     | 2,67                     |
| 10  | Chr     | Y=0,012x+0,0064       | 0,9993                                    | 0,5-100                           | 1,46                     | 4,41                     |
| 11  | BbF     | Y=0,0106x-0,0075      | 0,9990                                    | 0,5-100                           | 1,66                     | 5,02                     |
| 12  | BaP     | Y=0,0108x-0,0114      | 0,9983                                    | 0,5-100                           | 2,18                     | 6,60                     |
| 13  | BghiP   | Y=0,0132x-0,0149      | 0,9980                                    | 0,5-100                           | 2,37                     | 7,19                     |
| 14  | BkF     | Y=0,0144x-0,0167      | 0,9988                                    | 0,5-100                           | 1,83                     | 5,55                     |
| 15  | Ipy     | Y=0,0079x-0,0062      | 0,9984                                    | 0,5-100                           | 2,17                     | 6,57                     |
| 16  | DBahA   | Y=0,0089x-0,0056      | 0,9996                                    | 0,5-100                           | 1,11                     | 3,37                     |
| 17  | Per     | Y=0,0132x-0,0075      | 0,9993                                    | 0,5-100                           | 1,37                     | 4,15                     |

Table S2. Comparison of the developed method with other methods for the extraction of PAHs from lipidic media

| Method          | Matrix                      | Adsorbent                     | Sample Preparation                                                               | Limitations                                                                            | Ref.      |
|-----------------|-----------------------------|-------------------------------|----------------------------------------------------------------------------------|----------------------------------------------------------------------------------------|-----------|
| SPE/GC-MS       | Edible oils                 | C18/silica gel                | Saponification + LLE + SPE clean-up                                              | Labor-intensive sample preparation; nonspecific adsorption                             | 1         |
| SPE/GC-MS       | Edible oils                 | Florisil                      | n-Hexane extraction + DMF partition + clean-up                                   | Multistep extraction; high solvent consumption; extensive clean-up                     | 2         |
| SPE/HPLC-UV-Vis | Edible oils; barbecue foods | Silica-alumina nanocomposites | Solvent extraction, liquid-liquid partitioning, clean-up and concentration steps | Labor-intensive workflow; multiple sample handling steps; elevated solvent consumption | 3         |
| SPME/GC-FID     | roast meat samples          | COF-TpBD                      | Solvent partitioning, SPE clean-up and concentration steps                       | High solvent consumption; multiple purification steps                                  | 4         |
| SPE-GC-MS       | nonpolar media              | SiO <sub>2</sub> /G-CNDs      | Direct extraction from nonpolar media                                            | -                                                                                      | This work |

#### References

- (1) Cassimiro Belo, R. F.; Nunes, C. M.; Vieira Dos Santos, E.; Augusti, D. V.; Pissinatti, R. Single Laboratory Validation of a SPE Method for the Determination of PAHs in Edible Oils by GC-MS. *Anal. Methods* **2012**, *4* (12), 4068–4076. <https://doi.org/10.1039/c2ay25818h>.
- (2) Wu, S.; Yu, W. Liquid-Liquid Extraction of Polycyclic Aromatic Hydrocarbons in Four Different Edible Oils from China. *Food Chem.* **2012**, *134* (1), 597–601. <https://doi.org/10.1016/j.foodchem.2012.02.155>.
- (3) Dost, K.; Deli, C. Determination of Polycyclic Aromatic Hydrocarbons in Edible Oils and Barbecued Food by HPLC/UV-Vis Detection. *Food Chem.* **2012**. <https://doi.org/10.1016/j.foodchem.2012.01.001>.
- (4) Ma, T. T.; Shen, X. F.; Yang, C.; Qian, H. L.; Pang, Y. H.; Yan, X. P. Covalent Immobilization of Covalent Organic Framework on Stainless Steel Wire for Solid-Phase Microextraction GC-MS/MS Determination of Sixteen Polycyclic Aromatic Hydrocarbons in Grilled Meat Samples. *Talanta* **2019**, *201* (March), 413–418. <https://doi.org/10.1016/j.talanta.2019.04.031>.
